# Supplementary material for: Metallomic and lipidomic analysis of S. cerevisiae response to cellulosic copper nanoparticles uncovers drivers of toxicity
Source: Royal Society of Chemistry journal article supplement (doi:10.1039/d0mt00018c), 2020-04-02
Supplement: d0mt00018c1.csv [file d0mt00018c1.csv]

	Label	2-((4'-HYDROXYPHENYL)-AZO)BENZOIC ACID	2-Octaprenyl-6-hydroxyphenol	2,6-DIAMINO-8-PROPYLSULFANYLMETHYL-3H-QUINAZOLINE-4-ONE	20:5 Cholesterol ester;CE(20:5(5Z,8Z,11Z,14Z,17Z)	22:0-Glc-Sitosterol	22:0-Glc-Stigmasterol	2alpha,3alpha-(Difluoromethylene)-5alpha-androstan-17beta-ol acetate	4-Nitroquinoline N-oxide;4-Nitroquinoline 1-oxide	5,6-epoxy-3-hydroxy-12'-apo-beta-caroten-12'-al	5R-hydroxy-hexadecanoic acid;5-hydroxy-hexadecanoic acid;5S-hydroxy-hexadecanoic acid	8-AMINOGUANINE	9alpha-Fluoro-11beta,17alpha,21-trihydroxy-6alpha-methylpregna-1,4-diene-3,20-dione;9alpha-Fluoro-6alpha-methylprednisolone	BENZYL N-({(2S,3S)-3-[(PROPYLAMINO)CARBONYL]OXIRAN-2-YL}CARBONYL)-L-ISOLEUCYL-L-PROLINATE	D-Fucosamine;2-Amino-2,6-dideoxy-D-galactose	DG(16:0/20:4(5Z,8Z,11Z,14Z)/0:0)[iso2];DG(16:0/20:4(5Z,8Z,11Z,14Z)/0:0)	DG(16:1(9Z)/20:4(5Z,8Z,11Z,14Z)/0:0)[iso2];DG(16:1(9Z)/20:4(5Z,8Z,11Z,14Z)/0:0)	dibenzothiophene	Diflucortolone valerate	Elaidic acid;Oleic acid;9-elaidic acid	Galactosylglycerol	GlcCer(d15:1/18:0)	GlcCer(d15:1/20:0)	Hexadecanoic acid;Hexadecanoate;Hexadecylic acid;Palmitic acid;Palmitate;Cetylic acid	Hexahydro-1,3,5-trinitroso-1,3,5-triazine	Hydroxyspheroidenone	Isopimaric acid	L-cis-Cyclo(aspartylphenylalanyl)	Lauric acid;Dodecanoic acid	Lythramine	Malonylcarnitine	MG(14:0/0:0/0:0)	MG(14:1(9Z)/0:0/0:0)	MG(16:1(9Z)/0:0/0:0)	N2-(D-1-Carboxyethyl)-L-arginine;D-Octopine;N2-(1-Carboxyethyl)-L-arginine;Arginine, N2-(1-carboxyethyl)-, L-;D-(+)-Octopine;L-Arginine, N2-(1-carboxyethyl)-, (R)-;L-Arginine, N2-[(1R)-1-carboxyethyl]-;Octopine	OLOMOUCINE	PA(16:0/18:1(9Z))	PA(16:0/18:2(9Z,12Z))	PA(22:4(7Z,10Z,13Z,16Z)/20:3(8Z,11Z,14Z))	PA(P-20:0/0:0)	Palmitelaidic acid;Palmitoleic acid;cis-9-palmitoleic acid;trans-9-palmitoleic acid	PC(14:0/22:5(4Z,7Z,10Z,13Z,16Z))	PC(16:0/22:5(4Z,7Z,10Z,13Z,16Z))	PC(16:1(9E)/0:0);LysoPC(16:1(9Z));PC(16:1(9Z)/0:0)	PC(18:1(11Z)/0:0);LysoPC(18:1(11Z))	PC(18:3(6Z,9Z,12Z)/0:0);LysoPC(18:3(6Z,9Z,12Z))	PC(18:4(6Z,9Z,12Z,15Z)/0:0);LysoPC(18:4(6Z,9Z,12Z,15Z))	PC(20:0/18:4(6Z,9Z,12Z,15Z))	PC(20:3(8Z,11Z,14Z)/16:1(9Z))
CUTX1	CU TX	0.801468288	0.409788326	0.635825888	0.935200564	-0.363692348	-0.440784606	1.587593927	0.604734653	0.787966307	-0.912581303	0.432732034	0.365518237	-0.14122306	-0.481265995	0.25856279	0.312058784	1.014207492	2.462969218	0.323587559	2.274174534	-0.480148169	-0.780972941	0.397923957	1.547905179	1.246259675	3.505813447	0.925576884	0.662128422	2.474290575	-0.63125858	0.895259477	0.754121846	0.799924088	1.03840936	0.445457511	0.07545823	-0.755821475	-1.054241855	0.85363008	0.303532618	-0.000983605	-0.035562295	-0.800375306	-0.701840334	-0.349613423	-0.147103356	-0.345527795	-0.201426929
CUTX2	CU TX	0.692934431	-0.060304071	0.954952713	0.312704958	-0.474137192	-0.537873322	1.108672972	0.867982359	0.969030929	-0.978030934	0.440321256	0.583721354	0.139292561	-0.576849418	-0.748094991	-0.765018809	-1.410557259	1.247564781	0.766872025	0.800970874	-0.568177076	-0.855254054	0.77424471	0.153823318	-1.413775632	3.61303303	0.778824389	0.838862496	-0.752321945	-0.711628987	0.713717025	0.592013457	0.603260561	-0.052693588	-0.252098961	0.038746103	-0.834334813	-1.113915616	-0.922725809	0.750710249	-0.750109053	-0.848929193	-1.413119411	-0.767618062	-0.215856954	-0.079159217	-1.427849458	-0.976221816
CUTX4	CU TX	1.005144385	0.479462936	0.595587038	0.604879916	-0.75408028	-0.783962808	-1.44265078	0.195189546	1.080617755	-1.143925249	0.627366982	-0.240548927	0.262550268	-0.81912346	0.035747994	0.008751167	-1.630225251	-1.189525456	0.662966694	-1.69879475	-0.791302786	-1.04353341	0.481031636	0.38491642	-1.552836367	-0.921782541	1.064136678	0.552019335	-0.915494001	-0.915342799	1.180358458	1.452586932	1.435567449	-0.545076512	0.61940488	-3.466060738	-1.448306535	-1.265169911	-1.124996212	0.736846896	-0.3961796	-0.406532509	-0.806106254	-0.934344002	0.298764639	0.425973057	-0.570406146	-0.605618201
CUTX5	CU TX	0.93065997	0.305473177	1.220952869	0.384850618	-0.220239691	-0.314679722	1.213986862	0.399746524	0.62618677	2.194177283	0.498843485	-0.079152787	0.3212118	-0.357116279	-0.094166933	-0.133254871	0.747312234	2.885094048	0.205429615	0.778152465	-0.365810729	-0.684491996	0.160338141	0.881206836	-1.287652951	3.539336522	0.853948231	0.48363292	-0.604331233	-0.526868478	1.073925577	1.09630193	1.154400557	0.025793	0.84328087	0.217800786	-0.821921495	-0.976733849	-0.739274416	0.189728217	0.030982721	-0.063958265	-0.542285752	-0.616404114	0.30585243	0.39462214	-0.039435427	-0.068321383
CUTX6	CU TX	0.841524449	0.349711216	1.057571847	0.452664332	-0.65840532	-0.699857849	-1.374262757	0.181727169	1.068201083	-1.087228253	0.347020723	-0.144368613	0.242860366	-0.73632249	-0.293876865	-0.502547369	0.562044357	1.951413519	0.873370531	1.325112809	-0.71504606	-0.979185974	1.029253151	0.784057357	-1.50531017	-0.869802192	0.818035134	1.024403595	-0.859727381	-0.845720395	1.05956123	1.070313887	0.9816837	0.257202068	0.835986416	-3.410427097	-1.359572802	-1.213476373	-1.055867115	0.984515996	-0.367744864	-0.536616069	-0.818828366	-0.877362786	0.251635266	0.243828348	-0.581973439	-0.470463577
CUNPTX1	CUNP TX	0.124037089	-0.027524121	0.3270516	0.148820792	1.852413669	1.653829073	0.271365687	-0.145008743	-0.267872789	2.239599414	0.409063844	-0.390875801	-0.446095562	1.392038092	-0.084003376	-0.23847956	0.61783285	-0.851885289	-0.061280936	0.594680639	1.565446513	1.524535458	0.468318861	0.180833417	1.795875731	-0.575653512	-0.112176992	0.947356683	-0.544152783	1.619145907	0.180774889	-0.806425258	-0.595370608	-0.010812541	-0.228547226	0.827802968	0.481152332	-0.920950713	0.710673571	-0.24040167	0.810062393	0.71849768	0.516230457	1.913002359	-1.820838545	-1.639739685	0.567976424	0.721233683
CUNPTX2	CUNP TX	0.496092745	0.554084186	1.026334775	0.877578519	0.078552774	-0.05202032	0.914491918	0.918409432	-0.463038968	2.166779439	0.792311718	2.144696283	0.093107369	-0.098529226	0.935100774	0.872065386	1.334017333	-0.748249127	-0.51997566	0.787910789	-0.12766132	-0.483535247	-0.061856216	0.630590398	1.927741707	-0.469411756	0.276260575	0.499974416	-0.430172332	1.465440992	0.123822194	-0.86164737	-0.631060767	1.271228256	0.541542671	0.911031537	0.690623227	1.781332839	1.413286194	-0.713948697	0.989477986	0.875436418	-0.004792591	-0.438452035	-1.043812598	-0.71384197	0.813743375	0.80208367
CUNPTX3	CUNP TX	-0.109803681	0.286219658	-0.879250226	0.594427745	2.125767522	1.922732589	-0.886188876	0.072783188	-0.59210328	2.1061109	0.232118319	-0.639696298	-0.404549271	1.338019489	0.564598006	0.375822916	0.650080811	-0.776943086	-0.432423401	0.313377529	2.109067205	1.799786463	-0.069281414	-0.854552036	2.093275378	-0.498827131	-0.232636902	0.395189864	-0.461730335	1.721655408	0.56837971	-0.330109476	0.049350356	-0.22221189	-0.191981331	0.705826479	0.318766934	1.488316028	1.260603808	-0.770150794	0.890895346	0.869513132	0.924868719	2.144089651	-1.338643106	-1.223631645	0.772392969	0.793644132
CUNPTX4	CUNP TX	-0.180899465	0.163765787	0.140102873	0.579799145	0.315368655	2.149328337	0.765091562	0.502757244	-3.966368181	-0.510169653	0.210757534	0.199828659	0.223523565	2.007713999	0.57145761	0.482589802	1.056244146	2.158785837	-2.770080436	-0.921641463	2.432996597	2.207180062	-2.603738292	-0.194058697	2.349300806	-0.340749333	-0.388922836	-2.557097596	-0.292138082	2.176401381	-0.939670061	-2.021384577	-1.980737187	0.286630698	0.037150888	1.108836722	1.187753617	1.194501236	1.441845548	-2.794338711	0.812121413	0.846909493	1.911217819	2.997159371	-0.518846581	-0.318075135	0.570103163	0.68026309
CUNPTX5	CUNP TX	0.213401166	0.324372451	0.538723813	0.63498367	0.235841985	0.086247859	-0.735058889	1.025803168	-0.592838475	1.997945408	0.793004896	1.317250693	0.436612398	1.892063196	0.526414948	0.483693803	1.227248893	-0.66488947	-0.85382974	-0.979432359	-0.0022956	1.527740515	-0.558780741	0.084614421	1.735030552	-0.383956292	0.189618774	0.0789247	-0.338492255	2.022521107	0.078737136	-0.447693114	-0.584674088	0.347903854	0.470183551	0.439337536	-0.292326482	-0.730311218	1.595668498	-0.725354036	1.133666951	1.031587053	1.676867686	2.669171317	0.21985556	0.390222873	0.885932885	1.011919321
CUNPTX6	CUNP TX	-0.525693902	-0.118725333	0.4924739	0.46796555	1.709728454	1.851810029	-0.720385265	-0.189379128	-2.0040891	-0.545132021	-0.084203387	-0.221556215	-0.052838438	1.766966988	0.231247122	0.071748434	0.753049644	3.425955656	-1.930997542	-0.964514646	2.292488609	1.975289318	-1.840477112	-0.483440328	2.2430856	1.637219999	-0.650454628	-2.592418568	-0.326526732	1.824399707	-0.16714431	-0.91539737	-0.933418948	0.4526849	-0.458263345	0.794847089	0.366007504	1.284497339	1.630582068	-1.948460195	0.589473952	0.617264912	1.751504563	2.726659389	-0.246046977	-0.184281701	0.440076067	0.598187235
NOTX1	NO TX	1.059277779	0.055103874	0.230745768	0.185804428	0.02588323	-0.09832052	1.380372105	0.271619771	1.025969742	-0.681718758	0.37460703	-0.053771015	0.602942029	-0.144111574	-0.333677666	-0.046628566	0.653117386	-0.776162771	0.43518888	0.652313618	-0.169641029	-0.518958832	0.53872326	0.839757708	-1.165392264	-0.498027198	1.018389214	0.790936501	-0.460872135	-0.347765509	0.624933769	0.484360378	0.376006736	-0.834736693	0.615215185	0.481172989	0.206403408	-0.843752717	-0.561440476	0.595909584	0.447471012	0.378712318	-0.72370781	-0.46982048	-0.079752958	-0.084391691	0.492462018	0.544654236
NOTX2	NO TX	1.079021081	0.044658056	0.432723475	0.059239211	-0.082029166	-0.193183037	1.133960182	0.409857359	0.968083898	-0.74566766	0.517076995	-0.140743903	0.930539987	-0.237503315	-0.226861735	-0.077324124	-1.102874782	-0.833353854	0.018639424	0.495243584	-0.255651476	-0.591536714	-0.179875681	0.596155123	-1.218997363	-0.556656164	1.103852824	0.183931006	-0.523771661	-0.426293061	0.616082538	0.712361649	0.589517558	-1.134158005	0.481089825	0.850600231	0.877563442	-0.902058187	-0.639411623	0.154808998	0.498775715	0.49603218	-0.158424185	-0.534089956	0.370862686	0.407856497	0.522325549	0.53576393
NOTX3	NO TX	0.732217848	0.083516158	0.180554356	0.199090193	-0.244083724	-0.335640289	1.137097024	-0.128049196	1.208419261	-0.841701215	0.067438927	-2.269301295	0.640130886	-0.377751867	-0.382685526	-0.359269912	0.512314529	-0.919239035	0.321317537	0.551444805	-0.384815366	-0.70052861	0.270532527	0.349836814	-1.299497389	-0.644700649	0.665381015	0.613508114	-0.618229343	-0.544219715	0.716330506	0.823996467	0.661323176	-1.248641805	0.276608152	0.540930158	0.32934371	-0.989616869	-0.756502711	0.512861747	0.380634978	0.443373843	-0.565016097	-0.630604925	0.115820553	0.0684908	0.44586371	0.486779808
NOTX4	NO TX	0.810100117	0.389624372	0.737071895	0.395528143	-0.337865914	-0.418081371	0.789386034	-0.025066654	0.917600757	-0.897276555	0.04888041	-0.558807756	0.636498063	-0.458914757	-0.18365763	-0.03997882	0.474370678	-0.968941434	0.384179676	-1.396337707	-0.45956348	-0.763603038	0.425906088	0.338405926	-1.346083359	-0.695652653	0.771009539	0.617064918	-0.672892714	-0.612464755	1.319025152	1.531630015	1.448424653	-1.222704797	0.504028102	0.482886952	0.20660094	-1.040287737	-0.824264203	0.558669502	0.327714973	0.347632182	-0.772054569	-0.686458863	-0.131562691	-0.221847228	0.407336414	0.394156722
NOTX5	NO TX	0.685300689	0.363446906	0.721576523	0.268754351	-0.52219412	-0.580118711	0.985602313	-0.470892096	1.459767008	-1.006509476	-0.06695717	-0.354029401	-0.05925881	-0.618439823	-0.901707813	-0.786429799	0.210613434	-1.066631135	0.940403252	0.521476815	-0.606480348	-0.887575364	1.179228752	0.26030908	-1.43764774	-0.795798443	0.582765955	1.320189099	-0.780333167	-0.746599881	0.411872809	0.231502496	-0.012600309	-1.24235016	0.03843665	0.496018957	-0.020899685	-1.139880954	-0.957448918	1.181347137	-0.21285594	-0.315696505	-1.179041506	-0.796239367	-0.733924021	-0.879562845	-0.272823547	-0.234953632
NOTX6	NO TX	0.632799303	0.166940886	0.870144473	0.280122636	-0.296377469	-0.381610136	1.001435371	-0.367019639	1.207491479	-0.872690496	-0.134613096	-0.54956544	0.462176926	-0.423008984	-0.666206647	-0.551509052	0.263382358	-0.946953515	0.604215213	0.728374454	-0.426495549	-0.735699446	0.815380776	0.197226113	-1.325474121	-0.673111919	0.584974951	1.040815723	-0.648710103	-0.582273729	0.434395715	0.221956434	0.0460197	-1.121749525	0.2816443	0.658205583	0.314189543	-1.017871375	-0.794287094	0.823111154	0.289864395	0.28724872	-0.649808326	-0.661749555	-0.140507642	-0.301559036	0.395500172	0.27579345
NPTX1	NP TX	-2.324118205	-0.058555787	-0.717391311	-2.282834955	-0.527218682	-0.584535651	-1.280491151	-1.030347393	-0.099363524	-1.009487032	-0.387925683	-2.494597016	0.068348851	-0.622788281	-0.224953028	-0.235486015	-1.452209669	-1.069294037	0.819591556	1.013288984	-0.610485122	-0.890954698	0.379287996	-0.488349824	-1.440143674	-0.798528295	-0.587502963	0.452557886	3.239857323	-0.750256241	-3.648820667	-0.62186183	-0.53833885	0.99708594	-0.964877717	0.279458359	0.080813814	2.089168724	-0.96107937	0.684721103	-1.28419724	-1.074571519	-0.569078851	-0.79923185	0.869924114	0.744151307	-0.80808428	-1.131997692
NPTX2	NP TX	-2.381669192	-0.257860202	-0.070171008	-2.348106376	-0.609473241	-0.656843141	-1.339286332	-0.657441036	0.062191309	-1.058231096	-0.248122945	0.335264105	0.508685897	-0.693974694	-0.097763	-0.006663306	-1.516753837	-1.112887057	0.712666373	-1.593710877	-0.676045258	-0.946276069	0.358909363	-0.426364985	-1.481003333	-0.84321732	-0.5270572	0.460344812	-0.831206055	-0.810112656	0.101071736	-0.000181967	0.029098798	0.84108928	-1.009846338	0.386037155	0.481686152	-1.187038188	-1.020511674	0.605925108	-0.72782726	-0.567015303	-0.295361804	-0.848220266	0.882759118	0.649821282	-0.165992071	-0.465652255
NPTX3	NP TX	-0.270776442	0.580608331	-3.267773361	0.718809641	-0.742101615	-0.773432726	-1.434088485	-1.40420585	-0.473709081	-1.13682669	0.170289393	0.430525426	-4.393720895	-0.808756639	0.116100272	0.056866801	0.55379862	-1.183177039	1.017835681	0.542170225	-0.781755316	-1.035477003	0.857283062	-0.830613414	-1.546886007	-0.915274514	-0.850808907	0.7329174	-0.908511927	-0.906625957	-3.780433071	-0.525259889	-0.46690417	0.287590868	-1.045670481	-3.459095313	-0.583174873	2.958933192	1.412664252	0.911634313	-1.396248382	-1.374016162	-1.862605464	-0.927209858	-0.415642048	-0.734956939	-1.102056962	-1.337878816
NPTX4	NP TX	0.109946269	-0.698428444	-2.66272272	-1.69151961	0.21795252	0.070521773	-0.747846196	-0.018205344	-1.294615	-0.567898469	0.573365256	1.422870429	-1.660724558	0.022112937	0.085869119	0.110024622	-0.867482743	0.942786326	-0.622069102	-0.992432379	-0.016554211	-0.389780139	-0.923455817	-1.765928559	1.612012117	-0.393675665	-0.323519628	-0.616636011	3.507307997	-0.207997218	-1.13613517	-1.734123509	-1.783948958	0.413998826	-0.292709223	-0.109623377	-0.627364202	3.059475003	1.726313237	-0.693615993	-1.264192597	-1.16001673	0.614788207	-0.355429612	1.022527504	0.790161425	-0.935292851	-1.065944015
NPTX5	NP TX	-2.217302974	0.257389127	0.458762578	0.367455857	-0.374553362	-0.450332194	-1.171366681	-0.875578802	-0.549410528	1.740536806	-2.815107799	0.690118967	0.553008433	-0.490665555	0.580377992	0.542630999	-1.332415019	-0.988384936	-0.157154004	-1.422997951	-0.488804826	1.448908665	-0.672934374	-0.953517578	1.482261846	-0.715584998	-2.986870187	-2.970138976	2.431071087	-0.63916211	-0.22850849	-0.349288056	-0.343879297	1.196084136	-0.902782144	0.369182804	0.21457891	1.588657177	-0.850772394	-0.257910421	-0.455019775	-0.264877126	1.480060865	-0.708308837	1.048421571	0.903946552	-0.07058264	-0.2334787
NPTX6	NP TX	-2.203661748	-3.592767488	-3.023847758	-2.146219328	-0.355056684	-0.433193255	-1.157430545	-0.139416529	-1.078117374	1.549925611	-2.798268721	0.647220314	1.036921196	-0.473792343	0.332178582	0.426337491	-1.317116209	-0.978052146	-0.738453196	-1.408829994	-0.473265203	1.803923055	-1.225962633	-1.23281269	1.535856958	-0.704992424	-2.97282392	-2.958466737	-0.682912797	-0.624974431	-0.197536152	-0.357773073	-0.30364415	0.219434326	-0.643252237	0.781025886	0.988238831	-1.049575973	-0.836685241	-0.850142106	-0.345783519	-0.264416255	2.285067976	-0.696697184	1.648624102	1.509076167	0.006311869	-0.052522263
	"121030 anova figures"
[truncated: 57 more columns]
