# Supplementary material for: Metallomic and lipidomic analysis of S. cerevisiae response to cellulosic copper nanoparticles uncovers drivers of toxicity
Source: Royal Society of Chemistry journal article supplement (doi:10.1039/d0mt00018c), 2020-04-02
Supplement: d0mt00018c2.csv [file d0mt00018c2.csv]

	Comp 1	Comp 2	Comp 3	Comp 4	Comp 5	Comp 6	Comp 7	Comp 8
2-4'-HYDROXYPHENYL-AZOBENZOIC ACID	-0.20212	-0.037413	0.079927	0.073415	-0.089138	0.070323	-0.19598	0.038614
2-Octaprenyl-6-hydroxyphenol	-0.086792	-0.028336	0.046914	0.011655	-0.13106	0.18606	-0.018744	0.12284
2,6-DIAMINO-8-PROPYLSULFANYLMETHYL-3H-QUINAZOLINE-4-ONE	-0.23176	0.020908	0.060729	-0.041598	-0.022893	-0.10652	0.16201	0.028037
205 Cholesterol esterCE2055Z,8Z,11Z,14Z,17Z	-0.17163	-0.004297	0.00070644	-0.051278	-0.050165	0.17555	-0.10815	-0.18692
220-Glc-Sitosterol	-0.058253	0.087766	-0.098025	0.026273	-0.081539	0.089914	-0.00045797	0.074327
220-Glc-Stigmasterol	-0.066776	0.098238	-0.13514	0.046052	-0.060598	0.055505	-0.058901	0.022787
2alpha,3alpha-Difluoromethylene-5alpha-androstan-17beta-ol acetate	-0.15878	0.081503	0.081461	0.23345	-0.14117	-0.076683	0.021417	-0.24699
4-Nitroquinoline N-oxide4-Nitroquinoline 1-oxide	-0.11024	-0.0067283	-0.030522	0.022186	-0.044294	-0.059954	0.015324	0.098113
5,6-epoxy-3-hydroxy-12'-apo-beta-caroten-12'-al	-0.067566	-0.05222	0.23455	-0.084024	-0.051912	-0.019794	0.09258	0.028133
5R-hydroxy-hexadecanoic acid5-hydroxy-hexadecanoic acid5S-hydroxy-hexadecanoic acid	-0.047376	0.12056	-0.13875	-0.15027	-0.10205	0.10453	0.20474	-0.074638
8-AMINOGUANINE	-0.13098	-0.049669	0.02892	0.10707	-0.17093	0.12473	-0.13606	0.32127
9alpha-Fluoro-11beta,17alpha,21-trihydroxy-6alpha-methylpregna-1,4-diene-3,20-dione9alpha-Fluoro-6alpha-methylprednisolone	-0.013509	-0.04545	-0.085994	0.070805	0.12816	0.034324	-0.01828	0.099705
BENZYL N-2S,3S-3-PROPYLAMINOCARBONYLOXIRAN-2-YLCARBONYL-L-ISOLEUCYL-L-PROLINATE	-0.091197	0.10636	0.014694	-0.089411	0.090455	-0.3179	0.21984	0.040595
D-Fucosamine2-Amino-2,6-dideoxy-D-galactose	-0.076996	0.098632	-0.14255	0.02468	-0.0016939	0.1046	-0.0099367	0.065688
DG160/2045Z,8Z,11Z,14Z/00iso2DG160/2045Z,8Z,11Z,14Z/00	0.0081932	0.015001	-0.071885	-0.027911	-0.019793	0.047881	0.0090813	-0.010413
DG1619Z/2045Z,8Z,11Z,14Z/00iso2DG1619Z/2045Z,8Z,11Z,14Z/00	0.013693	0.024709	-0.056271	-0.012999	-0.012443	0.032534	0.013378	-0.01911
dibenzothiophene	-0.14711	0.053078	-0.03735	0.098985	0.057726	0.26113	-0.078384	-0.22908
Diflucortolone valerate	-0.1662	-0.21353	-0.14027	0.24332	0.13905	-0.098606	0.053188	-0.21241
Elaidic acidOleic acid9-elaidic acid	0.028954	-0.080091	0.1672	-0.074654	-0.066642	0.046829	0.047066	0.028738
Galactosylglycerol	-0.096942	-0.071743	0.077846	0.10182	-0.26206	0.14839	0.081458	-0.12004
GlcCerd151/180	-0.071986	0.10093	-0.15095	0.050374	-0.050934	0.049987	-0.073217	0.024438
GlcCerd151/200	-0.0089243	0.13853	-0.20599	-0.086503	0.095005	0.025344	0.061334	-0.16236
Hexadecanoic acidHexadecanoateHexadecylic acidPalmitic acidPalmitateCetylic acid	-0.024004	-0.05937	0.161	-0.066581	-0.091839	0.096537	0.018183	0.027691
Hexahydro-1,3,5-trinitroso-1,3,5-triazine	-0.1413	-0.019923	0.073156	-0.007974	-0.045259	-0.0037696	0.033878	-0.13185
Hydroxyspheroidenone	-0.021212	0.11117	-0.30091	0.079731	-0.076188	0.099835	0.075261	-0.24327
Isopimaric acid	-0.17101	-0.1867	-0.031977	0.2137	-0.16721	-0.14259	0.22247	-0.33473
L-cis-Cycloaspartylphenylalanyl	-0.18455	-0.048777	0.11621	0.085274	-0.14988	0.02507	-0.10279	0.23927
Lauric acidDodecanoic acid	-0.10693	-0.057589	0.20108	0.0099431	-0.24127	0.1881	-0.048425	0.25772
Lythramine	0.16123	-0.094822	-0.061613	0.189	-0.32615	0.048014	0.27952	-0.15935
Malonylcarnitine	-0.099962	0.12719	-0.17163	0.02423	-0.072984	0.12885	-0.038691	0.13043
MG140/00/00	-0.22868	0.031678	0.049968	-0.064767	0.18841	-0.20637	0.07464	-0.029958
MG1419Z/00/00	-0.084948	-0.056984	0.14206	-0.13027	0.060177	-0.079149	0.043909	-0.061137
MG1619Z/00/00	-0.084513	-0.056175	0.12737	-0.14046	0.019063	-0.069684	0.046905	-0.054623
N2-D-1-Carboxyethyl-L-arginineD-OctopineN2-1-Carboxyethyl-L-arginineArginine, N2-1-carboxyethyl-, L-D--OctopineL-Arginine, N2-1-carboxyethyl-, R-L-Arginine, N2-1R-1-carboxyethyl-Octopine	0.053566	-0.07927	-0.099487	0.011932	-0.052627	0.044051	0.13756	-0.033129
OLOMOUCINE	-0.11184	-0.0076255	0.029203	-0.010079	0.0014132	-0.013013	-0.036694	0.014469
PA160/1819Z	-0.038506	0.26196	-0.058854	0.25098	-0.092689	-0.15518	0.27551	-0.051829
PA160/1829Z,12Z	0.026909	0.16549	-0.034043	0.053057	0.035479	-0.047632	0.01528	0.0017274
PA2247Z,10Z,13Z,16Z/2038Z,11Z,14Z	0.18995	-0.023664	-0.14876	0.1642	-0.26712	0.25424	-0.11795	0.2433
PAP-200/00	-0.024801	0.015695	-0.1596	0.16563	-0.095538	0.27126	-0.11445	0.030569
Palmitelaidic acidPalmitoleic acidcis-9-palmitoleic acidtrans-9-palmitoleic acid	0.018824	-0.077746	0.1856	-0.069256	-0.031942	0.037824	0.037937	0.016356
PC140/2254Z,7Z,10Z,13Z,16Z	-0.12624	0.12573	-0.040579	-0.020091	0.011618	0.036531	0.0046665	-0.0042194
PC160/2254Z,7Z,10Z,13Z,16Z	-0.1068	0.12963	-0.042399	-0.016864	0.010496	0.028016	0.014347	-0.0068257
PC1619E/00LysoPC1619ZPC1619Z/00	0.028578	0.12138	-0.20099	-0.045257	0.15462	-0.069125	0.099522	-0.04142
PC18111Z/00LysoPC18111Z	-0.10995	0.12972	-0.20787	-0.0018416	0.0098361	0.15336	-0.02643	0.081394
PC1836Z,9Z,12Z/00LysoPC1836Z,9Z,12Z	0.11335	-0.055051	0.0077969	-0.020578	0.17449	-0.15451	0.11077	0.065717
PC1846Z,9Z,12Z,15Z/00LysoPC1846Z,9Z,12Z,15Z	0.082309	-0.052404	-0.0057743	-0.028897	0.13362	-0.16062	0.11384	0.063709
PC200/1846Z,9Z,12Z,15Z	-0.06582	0.14103	-0.030297	-0.015919	0.052691	0.040239	0.02127	0.012098
PC2038Z,11Z,14Z/1619Z	-0.096664	0.13667	-0.03711	-0.01158	0.049655	0.028967	0.018792	-0.00059836
PC2264Z,7Z,10Z,13Z,16Z,19Z/P-180	-0.12261	-0.12369	-0.011689	0.14844	-0.17197	-0.095392	0.17389	-0.1976
PE00/18111ZLysoPE00/18111Z	-0.063465	0.16896	-0.22203	-0.037782	-0.023686	0.024947	-0.066342	-0.032958
PE140/1829Z,12Z	0.22074	-0.029424	-0.12847	0.16159	-0.073961	-0.097796	0.12261	0.054778
PE1519Z/2247Z,10Z,13Z,16Z	-0.1642	0.11142	-0.046814	-0.036809	-0.0023212	0.032086	-0.0067568	-0.015399
PE1619Z/00LysoPE1619Z/00	-0.070412	0.17534	0.041842	-0.21298	0.14864	-0.31613	0.084626	0.25141
PE1819Z/150	-0.090236	0.11513	-0.16924	0.0076364	-0.021014	0.12527	-0.023801	0.071239
PE1829Z,12Z/1829Z,12Z	-0.21146	0.12248	-0.0085276	-0.010136	0.049479	0.01139	0.055972	0.096843
PE1836Z,9Z,12Z/1619Z	-0.1411	0.2037	-0.035068	0.1295	-0.059556	0.12412	-0.031777	-0.035348
PE1846Z,9Z,12Z,15Z/150	-0.22984	0.072132	-0.014065	-0.0021106	-0.062234	0.032098	-0.069809	0.074074
PE1846Z,9Z,12Z,15Z/1619Z	-0.24091	0.11166	0.010701	0.050466	0.017607	0.005112	-0.031601	0.15352
PE20211Z,14Z/150	-0.11956	0.26611	-0.21872	-0.025228	0.017398	0.087357	0.043237	-0.18845
PE2038Z,11Z,14Z/1829Z,12Z	-0.077017	0.1529	-0.046965	-0.0052072	0.021579	-0.04119	0.0847	0.016951
PE2048Z,11Z,14Z,17Z/150	-0.13955	0.11659	-0.038127	-0.038705	0.029235	0.021539	0.015392	-0.011074
PE2055Z,8Z,11Z,14Z,17Z/160	-0.17433	0.16687	-0.014308	-0.11579	0.025236	-0.18358	0.17823	-0.054355
PE22113Z/150	-0.053064	0.18607	-0.26324	-0.084849	0.019412	0.073295	0.018089	-0.081646
PE2247Z,10Z,13Z,16Z/150	-0.13125	0.13138	-0.039826	-0.01964	0.034042	0.037522	0.0022661	-0.011447
PG130/1829Z,12Z	0.044623	0.039388	-0.18361	0.23975	0.045102	-0.13328	-0.16837	0.065514
PG1719Z/150	-0.034465	0.12708	-0.19806	0.040815	-0.013248	-0.10337	-0.13227	0.044727
PG1839Z,12Z,15Z/130	0.0054554	0.018525	-0.15964	0.2949	-0.036878	-0.032425	-0.16495	0.21403
PI1419Z/220	0.04354	0.19053	-0.042224	0.1821	-0.28176	-0.044932	-0.02649	-0.082475
PI1619Z/160	0.048043	0.19351	-0.041455	0.18252	-0.27594	-0.053905	-0.011366	-0.095544
PI1619Z/180	-0.0068853	0.12387	-0.060742	0.13304	-0.068047	-0.0043798	-0.045226	0.099982
PI1629Z,12Z/160	-0.019087	0.041066	-0.1578	0.2491	-0.032638	-0.03879	-0.16048	0.16154
PS120/22111Z	-0.10464	0.27736	-0.020927	0.13752	-0.095877	-0.13946	0.28578	-0.15769
PS1719Z/00	0.21204	-0.1706	-0.021393	0.25984	-0.33869	0.28571	-0.049417	-0.080186
PS22213Z,16Z/120	-0.043705	0.27424	-0.034009	0.23843	-0.097232	-0.16014	0.3022	-0.045204
PSO-160/1839Z,12Z,15Z	0.13445	-0.10152	-0.060208	0.2031	-0.3105	0.055606	0.27215	-0.22499
RobustineFuro2,3-bquinolin-8-ol, 4-methoxy-	-0.12843	-0.26622	-0.050784	0.2568	0.091158	-0.13302	0.18935	0.02061
Solacapine	-0.011213	-0.013072	-0.075312	0.017329	0.042566	0.10476	-0.0042777	-0.10884
Stearic acid	-0.03883	-0.060302	0.15717	-0.062625	-0.088994	0.084432	0.024796	0.013192
Temozolomide	-0.11025	0.023236	-0.10599	0.079867	-0.18712	0.035362	0.049715	0.13798
Tetradecanoic acidTetradecanoateMyristic acid	-0.022084	-0.059863	0.18753	-0.074516	-0.078888	0.11561	0.063734	0.060676
TG120/120/1846Z,9Z,12Z,15Ziso3	-0.055413	0.076167	-0.13049	0.073558	-0.0096412	0.01202	-0.061715	0.10415
TG120/120/2055Z,8Z,11Z,14Z,17Ziso3	0.0021464	-0.05413	0.17218	-0.065606	-0.01403	0.033256	0.054162	-0.15391
TG120/1419Z/1836Z,9Z,12Ziso6	0.033458	0.018184	0.041557	-0.093827	0.044082	0.061546	0.021617	-0.045934
TG120/1619Z/2038Z,11Z,14Ziso6	0.0367	0.0096689	0.059072	-0.087958	0.039052	0.063471	0.011017	-0.049092
TG130/1729Z,12Z/1839Z,12Z,15Ziso6	0.018672	0.01524	0.062438	-0.090395	0.03283	0.064704	0.0040723	-0.05798
TG140/140/2257Z,10Z,13Z,16Z,19Ziso3	0.012049	0.013802	0.055139	-0.084155	0.012277	0.075275	-0.0081335	-0.027749
TG140/1419Z/1846Z,9Z,12Z,15Ziso6	0.0217	0.01491	0.066303	-0.073383	0.038327	0.03349	0.0079428	-0.065076
TG1419Z/1419Z/1829Z,12Ziso3	0.039519	0.019243	0.05618	-0.08906	0.031099	0.061751	0.0051245	-0.0493
TG1419Z/1819Z/1846Z,9Z,12Z,15Ziso6	-0.0034024	0.011713	0.058576	-0.090027	0.012746	0.078078	-0.011609	-0.04867
TG160/1619Z/2045Z,8Z,11Z,14Ziso6	0.010499	0.012663	0.060329	-0.091539	0.0010092	0.074052	-0.020658	-0.02233
TG160/180/2045Z,8Z,11Z,14Ziso6	0.024502	0.020221	0.058256	-0.096335	0.0028766	0.076357	-0.021795	0.0059685
TG160/1819Z/2045Z,8Z,11Z,14Ziso6	0.0072676	0.011395	0.066724	-0.087806	-0.0044536	0.075117	-0.029886	-0.017281
TG160/1829Z,12Z/2045Z,8Z,11Z,14Ziso6	0.0018545	0.013283	0.078364	-0.074713	-0.0041035	0.061356	-0.036692	-0.028489
TG1619Z/1619Z/1829Z,12Ziso3	0.039905	0.014436	0.051865	-0.092538	0.023965	0.076131	0.0030547	-0.021411
TG1619Z/1619Z/2045Z,8Z,11Z,14Ziso3	-0.0049456	0.012677	0.065519	-0.086667	3.186e-05	0.069105	-0.025614	-0.047896
TG1619Z/1819Z/1829Z,12Ziso6	0.028703	0.014456	0.053752	-0.089298	0.00058952	0.084743	-0.010819	-0.0087084
TG180/22113Z/2247Z,10Z,13Z,16Ziso6	-0.098263	0.0058952	0.091468	-0.071119	-0.25403	0.15941	-0.13905	0.047549
TG1819Z/1819Z/2045Z,8Z,11Z,14Ziso3	-0.16158	-0.0016977	0.094031	-0.030273	-0.040206	0.16107	-0.17064	-0.0065572
TG1829Z,12Z/1829Z,12Z/200iso3	-0.044025	0.024093	0.11155	-0.11859	-0.1056	0.16329	0.019109	0.079172
TG1829Z,12Z/1829Z,12Z/20111Ziso3	0.0097455	0.015216	0.078002	-0.078517	-0.025015	0.072491	-0.031816	-0.032471
TG200/200/2045Z,8Z,11Z,14Ziso3	-0.018635	0.14419	0.06506	0.086596	-0.025715	0.21925	-0.19114	-0.1309
TG200/20111Z/2045Z,8Z,11Z,14Ziso6	-0.0088573	0.13076	0.070726	0.070818	0.018227	0.22282	-0.17148	-0.16767
TG200/20211Z,14Z/22213Z,16Ziso6	-0.031821	0.12803	0.08268	-0.040822	-0.13213	0.13845	-0.28041	0.0319
Tokoronin	0.0081056	0.0093186	-0.094318	0.22861	-0.03634	-0.0013295	-0.11845	0.31289
Valerenic acid	-0.022452	0.073962	-0.19003	0.22688	-0.2007	0.078981	-0.15679	0.24822
